# Supplementary material for: Synthesis of PLA–poly(ether urethane)–PLA copolymers and design of biodegradable anti-adhesive membranes for orthopaedic applications
Source: Royal Society of Chemistry journal article supplement (doi:10.1039/d0tb02545c), 2020-12-08
Supplement: d0tb02545c1.pdf [file d0tb02545c1.pdf]

## Supporting informations

### Synthesis of PLA-poly(ether urethane)-PLA copolymers and design of biodegradable anti-adhesive membranes for orthopaedic applications

Zebiri Hadda, <sup>a</sup> Van Den Berghe H el ene, <sup>\*a</sup> Sayegh Syreina, <sup>b</sup> Chammas Pierre-Emmanuel, <sup>c</sup> Pomp ee Christian, <sup>a</sup> Chammas Michel, <sup>c</sup> Garric Xavier <sup>a</sup>

<sup>a</sup> Institut des Biomol cules Max Mousseron (IBMM), UMR 5247, CNRS, Universit  de Montpellier, ENSCM, Facult  de Pharmacie, B timent I, 15 avenue Charles Flahault, BP14491, 34093 Montpellier cedex 5, France

<sup>b</sup> Institut Europ en des Membranes, IEM—UMR 5635, University of Montpellier, ENSCM, CNRS, Place Eug ne Bataillon, 34095 Montpellier, France

<sup>c</sup> Chirurgie de la main et du membre sup rieur, Chirurgie des nerfs p riph riques, H pital Lapeyronie, CHRU Montpellier, 371, avenue du Doyen Gaston-Giraud, 34295 Montpellier cedex 5, France

\* Corresponding author: [helene.van-den-berghe@umontpellier.fr](mailto:helene.van-den-berghe@umontpellier.fr)

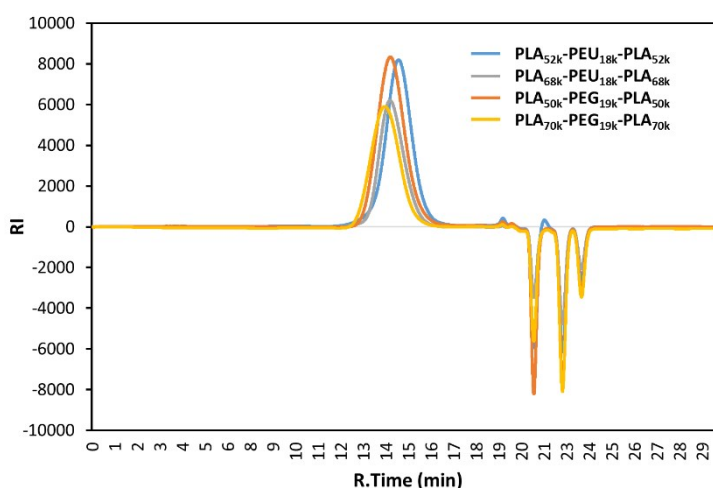

Fig. S1 SEC analysis of triblock copolymers in THF

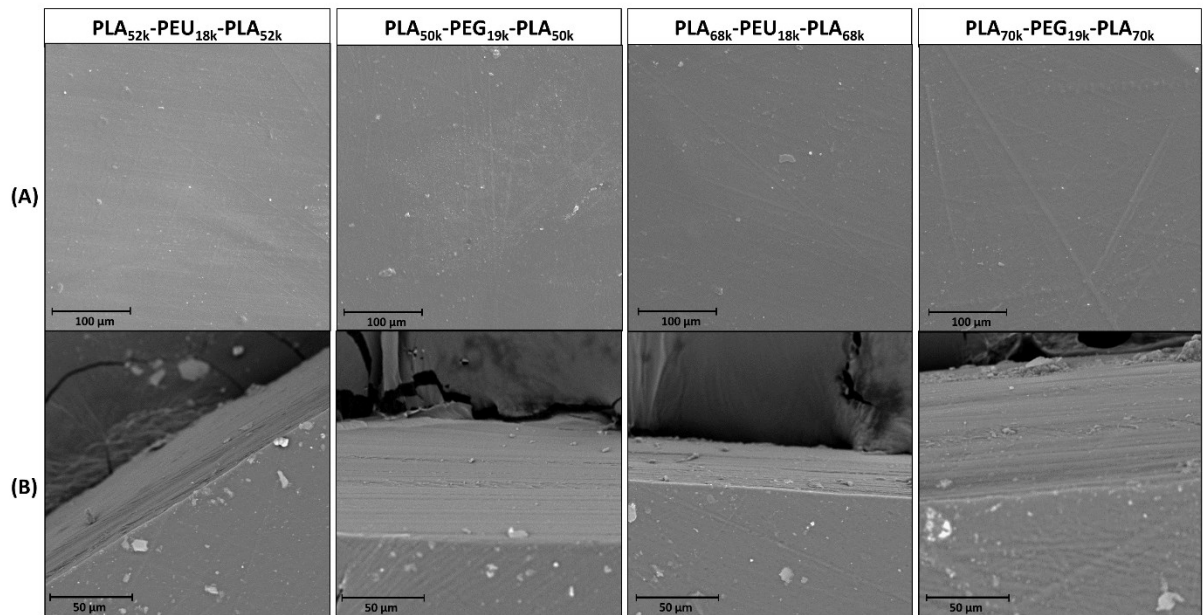

**Fig. S2** SEM images of membranes based on triblock copolymers (A) Membrane surface (scale barre: 100  $\mu\text{m}$ ), (B) Membrane cross section (scale barre: 50  $\mu\text{m}$ ).

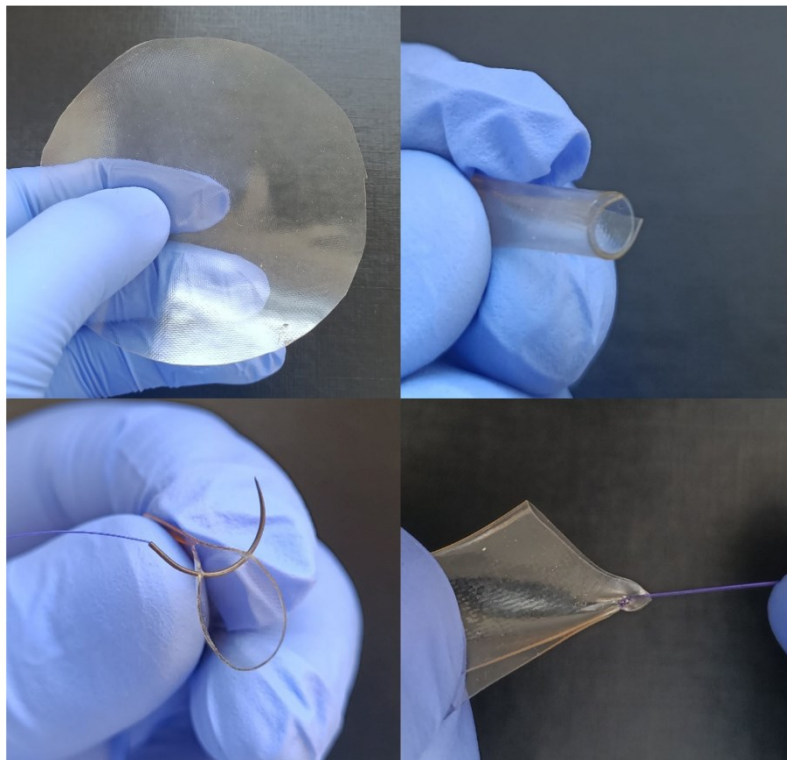

**Fig. S3** Tests of resistance, flexibility and suturability of PEG based-copolymer membranes

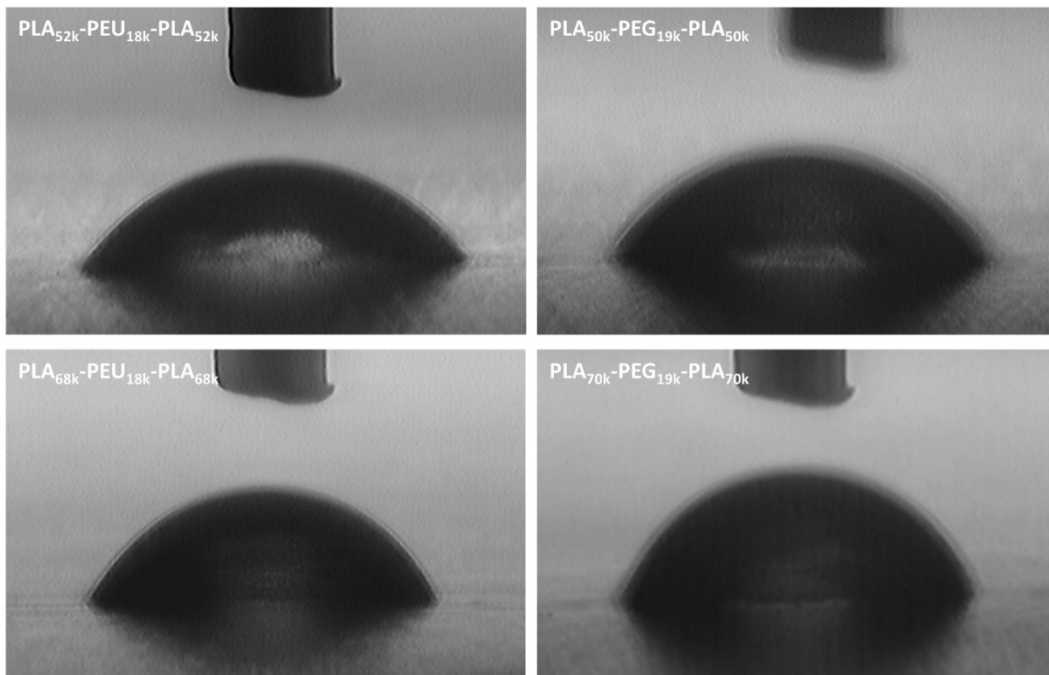

**Fig. S4** Water contact angle images of PEU and PEG based-copolymer membranes

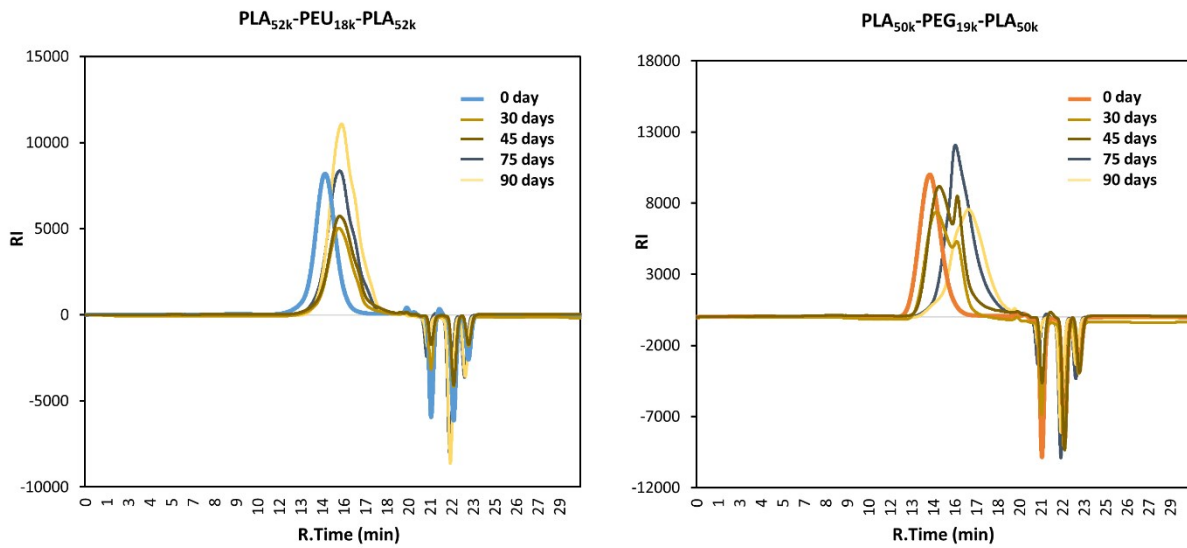

**Fig. S5** SEC analysis of the degraded products of PLA<sub>52k</sub>-PEU<sub>18k</sub>-PLA<sub>52k</sub> and PLA<sub>50k</sub>-PEG<sub>19k</sub>-PLA<sub>50k</sub> membranes

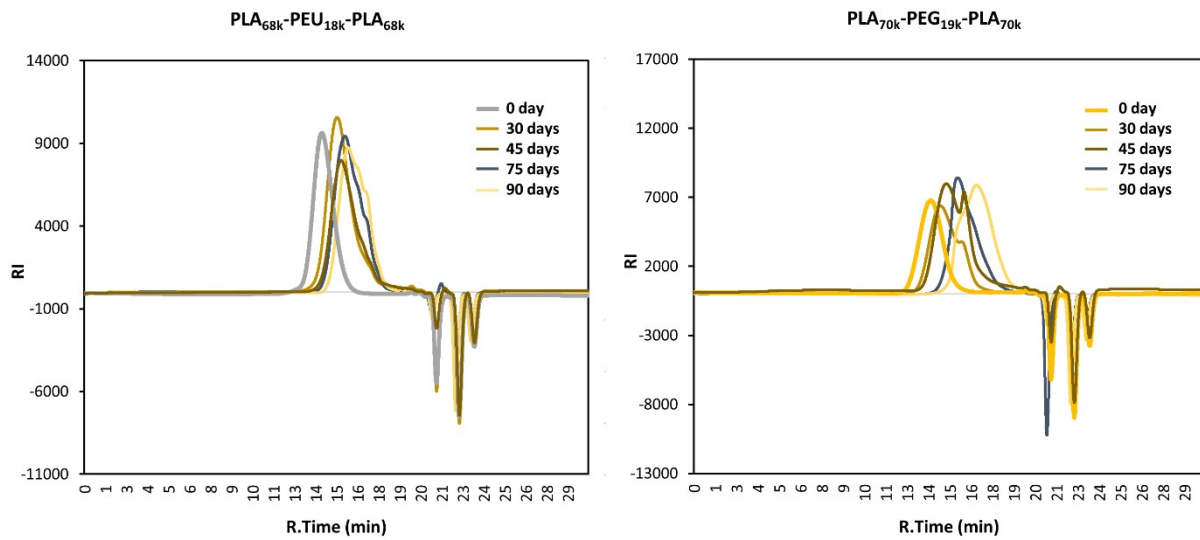

**Fig. S6** SEC analysis of the degraded products of  $PLA_{68k}-PEU_{18k}-PLA_{68k}$  and  $PLA_{70k}-PEG_{19k}-PLA_{70k}$  membranes
